# Supplementary material for: Comprehensive Analysis of Gene Expression Profiling to Explore Predictive Markers for Eradication Therapy Efficacy against Helicobacter pylori-Negative Gastric MALT Lymphoma
Source: MDPI journal article supplement (doi:10.3390/cancers15041206), 2023-02-14
Supplement: s1 [file s1]

## Supplementary Material

**Table S1. Patient backgrounds according to *Helicobacter pylori* infection in gastric MALT**

### lymphoma

|                               |             | Hp+                 | Hp-                 | P-value  |
|-------------------------------|-------------|---------------------|---------------------|----------|
|                               |             | (n = 87)            | (n = 50)            |          |
| Median age (range)            |             | 61.3 ± 12.5 (45–82) | 61.5 ± 12.6 (32–88) | 0.924    |
| Sex                           | Male        | 42 (48%)            | 18 (36%)            | 0.211    |
|                               | Female      | 45 (52%)            | 31 (64%)            |          |
| Mucosal atrophy               | Closed-type | 45 (52%)            | 44 (88%)            | < 0.001* |
|                               | Open-type   | 42 (48%)            | 6 (12%)             |          |
| Effect of eradication therapy | CR          | 64 (74%)            | 17 (34%)            | < 0.001* |
|                               | NC          | 23 (26%)            | 33 (66%)            |          |
| Number of lesions             | Single      | 33 (38%)            | 14 (28%)            | 0.267    |
|                               | Multiple    | 54 (62%)            | 36 (72%)            |          |
| Location                      | U           | 11 (13%)            | 12 (24%)            | 0.0814   |
|                               | M/L         | 76 (87%)            | 38 (76%)            |          |
| Morphological type            | Superficial | 64 (74%)            | 42 (84%)            | 0.160†   |
|                               | Elevated    | 15 (17%)            | 4 (8%)              | 0.131†   |
|                               | Other       | 8 (9%)              | 4 (8%)              | 0.811†   |
| <i>API2-MALT1</i> gene        | Present     | 3 (4%)              | 14 (28%)            | < 0.001* |
|                               | Absent      | 81 (96)             | 36 (72%)            |          |

Fisher's exact test was performed for categorical variables.

Mann–Whitney *U* test was performed for comparative analyses of continuous variables.

\* Statistically significant.

† Significance level ( $P < 0.05/3$ ) was adjusted with Bonferroni correction for multiple comparisons.

U, upper part of stomach; M, middle part of stomach; L, lower part of stomach

API2-MALT1, API2-MALT1 chimeric transcript; Hp, *Helicobacter pylori*; CR, complete response (ChR and pMRD according to GELA histological grading system); NC, no change (rRD and NC according to GELA histological grading system)

**Table S2. Primers for validation study**

| Target gene    | Direction | Sequence (5'-3')             | Product size (bp) | References |
|----------------|-----------|------------------------------|-------------------|------------|
| <i>h-GAPDH</i> | Forward   | TCCCTGAGCTGAACGGGAAG         | 217               | [55]       |
|                | Reverse   | GGAGGAGTGGGTGTCGCTGT         |                   |            |
| <i>ALAS2</i>   | Forward   | CGGGGCGCTGGGATTGG            | 173               | [56]       |
|                | Reverse   | GGGGGCAGAGAAGTGGTAAAGAT<br>G |                   |            |
| <i>OLFM4</i>   | Forward   | ACTGTCCGAATTGACATCATGG       | 135               | [57]       |
|                | Reverse   | TTCTGAGCTTCCACCAAACTC        |                   |            |
| <i>HBA1</i>    | Forward   | GGTCCCCACAGACTCAGAGA         | 287               | [58]       |
|                | Reverse   | AGTGCGGGAAGTAGGTCTTG         |                   |            |

|                     |         |                               |     |                                                                                                                                    |
|---------------------|---------|-------------------------------|-----|------------------------------------------------------------------------------------------------------------------------------------|
| <i>HBA2</i>         | Forward | CTGGACAAGTTCCTGGCTTC          | 165 | [58]                                                                                                                               |
|                     | Reverse | TGCTGCCCACTCAGACTTTA          |     |                                                                                                                                    |
| <i>HBB</i>          | Forward | GCAACCTCAAACAGACACCA          | 313 | [59]                                                                                                                               |
|                     | Reverse | CAGCATCAGGAGTGGACAGA          |     |                                                                                                                                    |
| <i>HLA-DRB3</i>     | Forward | CATGGTGTGTCTGAAGCTCCC         | 140 | Self-designed,<br>ACCESSION<br>NM_022555                                                                                           |
|                     | Reverse | AGAAATGACACTCAGACTTACGCA<br>G |     |                                                                                                                                    |
| <i>NPIP3</i>        | Forward | TCGTGGGACTGACTTTGGTG          | 215 | Self-designed,<br>NM_130464.3 <i>Homo sapiens</i> nuclear pore<br>complex interacting<br>protein family member<br>B3 (NPIP3), mRNA |
|                     | Reverse | AAATGGACCTCAGCCCTTCC          |     |                                                                                                                                    |
| <i>LEP</i>          | Forward | GAAGACCACATCCACACACG          | 189 | [60]                                                                                                                               |
|                     | Reverse | AGCTCAGCCAGACCCATCTA          |     |                                                                                                                                    |
| <i>MTRNR2L</i><br>8 | Forward | TGCCCAGTGACATGCGTTT           | 235 | Self-designed,<br>NM_001190702.2 <i>Hom</i><br><i>o sapiens</i> MT-RNR2<br>like 8 (MTRNR2L8),<br>mRNA                              |
|                     | Reverse | GGCCTGTGGACTTGTTAAGTG         |     |                                                                                                                                    |
| <i>NANOG</i>        | Forward | CCCAAAGGCAAACAACCCACTTCT      | 107 | [61]                                                                                                                               |
|                     | Reverse | AGCTGGGTGGAAGAGAACACAGT<br>T  |     |                                                                                                                                    |
| <i>OTUD6A</i>       | Forward | TGGATGATCCGAAGAGTGAAC         | 202 | [62]                                                                                                                               |
|                     | Reverse | TCTTGGAAGTTCTCCAGTCTCT        |     |                                                                                                                                    |

|                |         |                          |     |                           |
|----------------|---------|--------------------------|-----|---------------------------|
|                | Forward | CGCTGCTAGTTCTTGGCTCT     |     | Self-designed,            |
|                |         |                          |     | NM_024804.3               |
| <i>ZNF669</i>  | Reverse | CACTCACCATTCTCGGCTT      | 128 | (transcript variant [55]) |
|                |         |                          |     | & NM_001142572.2          |
|                |         |                          |     | (transcript variant [56]) |
| <i>TMEM130</i> | Forward | CCAGCCATTACCCATCTGT      | 133 | Self-designed,            |
|                | Reverse | CTGGGAGTCAACACGGAACA     |     | BC037895                  |
|                | Forward | CAGCAAGTGCCAATGGTTGA     |     |                           |
| <i>GSTAI</i>   | Reverse | TATTTGCTGGCAATGTAGTTGAGA | 80  | [58]                      |
|                |         | A                        |     |                           |
| <i>ZNF556</i>  | Forward | AGTGTGGGAAAGCCTACTGC     | 215 | [58]                      |
|                | Reverse | TTTGACATCTGTGGAGGGGC     |     |                           |
| <i>ACTAI</i>   | Forward | CTAGACACACTCCACCTCCA     | 132 | [59]                      |
|                | Reverse | GTCAGTTTACGATGGCAGCA     |     |                           |
| <i>APOBEC3</i> | Forward | GAGAAGGGACAAGCACATGG     | 61  | [63]                      |
| <i>A</i>       | Reverse | TGGATCCATCAAGTGTCTGG     |     |                           |

## Supplementary Methods

### Diagnosis and staging of gastric MALT lymphoma

Gastric MALT lymphoma was diagnosed according to the criteria of the World Health Organization [64] and if the symptoms were consistent with grade 4 or 5 of the Wotherspoon

histological scoring system [65]. Our study included patients with atypical lymphocytes that were positive for CD20 and CD79a and negative for CD3. After eradication therapy, histopathological evaluation was performed using the Group d'Etude des Lymphomes de l'Adulte (GELA) grading system [30]. CR of lymphoma was defined as complete histological response (ChR) or probable minimal residual disease (pMRD) in the Ann Arbor staging system [67]. Tumor stage was evaluated via clinical examination; full blood count; biochemical analysis; and cervical, pectoral, abdominal, and pelvic computed tomography scans.

### **Eradication therapy**

To eradicate *Helicobacter* species, patients with gastric MALT lymphoma received a 1-week course of oral PPI (lansoprazole 30 mg)/P-CAB (Vonoprazan fumarate 20mg), amoxicillin 750 mg, and clarithromycin (200/400 mg) twice a day as first-line eradication therapy. The choice of PPI/P-CAB and dose of clarithromycin were based on the patients' condition and time period. Here, treatment with this regimen was defined as "eradication therapy," regardless of Hp infection status. In Hp-positive patients, when the Hp was not successfully eradicated following first-line eradication therapy, a second-line eradication therapy regimen (PPI/P-CAB, amoxicillin 750 mg, and metronidazole 250 mg, twice a day) was administered. Conversely, in Hp-negative gastric MALT lymphoma cases, eradication therapy was conducted only once with first-line eradication

therapy regimen.

### **RNA extraction and reverse transcription**

Total RNA was extracted from biopsy specimens of gastric MALT lymphoma tumor lesions before therapeutic intervention (eradication therapy) using an RNeasy Kit (Qiagen, Tokyo, Japan). cDNA was synthesized from 1 µg total RNA using a first-strand cDNA synthesis kit (Amersham Biosciences, Piscataway, NJ, USA). Reverse transcription of RNA into cDNA was performed with a first-strand cDNA synthesis kit (Amersham Biosciences, Buckinghamshire, UK) [68].

### **Quantitative reverse transcription polymerase chain reaction**

Quantitative reverse transcription polymerase chain reaction (qRT-PCR) was performed using a LightCycler FastStart DNA Master SYBR Green I Kit (Roche Diagnostics, Basel, Switzerland). To correct for differences in sRNA quality and quantity between samples, expression values were reported, normalized to glyceraldehyde-3-phosphate dehydrogenase (*GAPDH*), and subsequently mean-centered. Primers for PCR were designed as previously described [69], and other primer sequences were determined according to previous reports [55-63]. Primer sequences are listed in Table S2.

## **Transcription factor prediction of DEGs**

We used the getorf program to find open reading frames (ORFs) of each DEG. For plants, we aligned ORFs to transcription factor (TF) domains (from PlntfDB) using hmmsearch [70]; for animals, we aligned ORFs to the animal TF database (AnimalTFDB) using DIAMOND [71].

Software information: PlntfDB, Version: v23.0. (<http://plntfdb.bio.uni-potsdam.de/v3.0/>)

AnimalTFDB: Version: v2.0. Website: <http://www.bioguo.org/AnimalTFDB/>

getorf: Version: EMBOSS:6.5.7.0 Parameters: -minsize 150 (<http://www.bioinformatics.nl/cgi-bin/emboss/help/getorf>)

hmmsearch: Version: v3.0. Parameters: default. (<http://hmmer.org>)

DIAMOND: Version: v0.8.31. Parameters: --more-sensitive --evaluate 1e-5.  
(<https://github.com/bbuchfink/diamond>)

## **PPI analysis of DEGs**

We used DIAMOND [71] to map the DEGs to the STRING [39] database to obtain the interaction between DEG-encoded proteins using homology with known proteins. We selected the top 100 interaction networks to draw the picture; for the entire interaction result, we used an input file that could be imported directly into Cytoscape for network analysis. Cytoscape is a software for complex network analysis and visualization (<https://cytoscape.org/>).

STRING: Version: v10, Website: <http://string-db.org/>

DIAMOND: Version: v0.8.31, Parameters (Running): --evaluate 1e-5 --outfmt 6 --max-target-seqs

1 --more-sensitive. Parameters (Selecting): query coverage  $\geq$  50%, identity  $\geq$  40%

(<https://github.com/bbuchfink/diamond>)

### Supplementary References

55. Zainuddin, A.; Chua, K. H.; Abdul Rahim, N.; Makpol, S. Effect of Experimental Treatment on GAPDH mRNA Expression as a Housekeeping Gene in Human Diploid Fibroblasts. *BMC Mol. Biol.* **2010**, *11*, 59.
56. Kaneko, K.; Furuyama, K.; Aburatani, H.; Shibahara, S. Hypoxia Induces Erythroid-Specific 5-Aminolevulinate Synthase Expression in Human Erythroid Cells Through Transforming Growth Factor-Beta Signaling. *FEBS J.* **2009**, *276*, 1370–1382.
57. Ma, H.; Tian, T.; Liang, S.; Liu, X.; Shen, H.; Xia, M.; Liu, X.; Zhang, W.; Wang, L.; Chen, S.; Yu, L. Estrogen Receptor-Mediated miR-486-5p Regulation of OLFM4 Expression in Ovarian Cancer. *Oncotarget* **2016**, *7*, 10594–10605.
58. Vishnubalaji, R.; Sasidharan Nair, V.; Ouarrhni, K.; Elkord, E.; Alajez, N. M. Integrated Transcriptome and Pathway Analyses Revealed Multiple Activated Pathways in Breast Cancer. *Front. Oncol.* **2019**, *9*, 910.
59. Tian, Z.; Palmer, N.; Schmid, P.; Yao, H.; Galdzicki, M.; Berger, B.; Wu, E.; Kohane, I. S. A Practical Platform for Blood Biomarker Study by Using Global Gene Expression Profiling of Peripheral Whole Blood. *PLOS ONE* **2009**, *4*, e5157.
60. Kumar, J.; Fang, H.; McCulloch, D. R.; Crowley, T.; Ward, A. C. Leptin Receptor Signaling via Janus Kinase 2/Signal Transducer And Activator Of Transcription 3 Impacts on Ovarian Cancer Cell Phenotypes. *Oncotarget* **2017**, *8*, 93530–93540.
61. Park, S. W.; Do, H. J.; Choi, W.; Song, H.; Chung, H. J.; Kim, J. H. NANOG Gene Expression Is Regulated by the ETS Transcription Factor ETV4 in Human Embryonic Carcinoma NCCIT Cells. *Biochem. Biophys. Res. Commun.* **2017**, *487*, 532–538.
62. Kim, S. Y.; Kwon, S. K.; Lee, S. Y.; Baek, K. H. Ubiquitin-Specific Peptidase 5 and Ovarian Tumor Deubiquitinase 6A Are Differentially Expressed in p53+/+ and p53−/− HCT116 Cells. *Int. J. Oncol.* **2018**, *52*, 1705–1714.
63. Burns, M. B.; Lackey, L.; Carpenter, M. A.; Rathore, A.; Land, A. M.; Leonard, B.; Refsland, E. W.; Kotandeniya, D.; Tretyakova, N.; Nikas, J. B.; Yee, D.; Temiz, N. A.; Donohue, D. E.; McDougale, R. M.; Brown, W. L.; Law, E. K.; Harris, R. S. APOBEC3B Is an Enzymatic Source of Mutation in Breast Cancer. *Nature* **2013**, *494*, 366–370.
64. Swerdlow, S. H.; Campo, E.; Pileri, S. A.; Harris, N. L.; Stein, H.; Siebert, R.; Advani, R.; Ghielmini, M.; Salles, G. A.; Zelenetz, A. D.; Jaffe, E. S. The 2016 Revision of the World Health Organization Classification of Lymphoid Neoplasms. *Blood* **2016**, *127*, 2375–2390.
65. Wotherspoon, A. C.; Ortiz-Hidalgo, C.; Falzon, M. R.; Isaacson, P. G. Helicobacter pylori-Associated Gastritis and Primary B-Cell Gastric Lymphoma. *Lancet* **1991**, *338*, 1175–1176.
66. Copie-Bergman, C.; Gaulard, P.; Lavergne-Slove, A.; Brousse, N.; Fléjou, J. F.; Dordonne, K.; de Mascarel, A.; Wotherspoon, A. C. Proposal for a New Histological Grading System for Post-treatment Evaluation of Gastric MALT Lymphoma. *Gut* **2003**, *52*, 1656.
67. Musshoff, K. [Clinical Staging Classification of Non-Hodgkin's Lymphomas (Author's Transl)]. *Strahlentherapie* **1977**, *153*, 218–221.



68. Yuge, R.; Kitadai, Y.; Takigawa, H.; Naito, T.; Oue, N.; Yasui, W.; Tanaka, S.; Chayama, K. Silencing of Discoidin Domain Receptor-1 (DDR1) Concurrently Inhibits Multiple Steps of Metastasis Cascade in Gastric Cancer. *Transl. Oncol.* **2018**, *11*, 575–584.
69. Takigawa, H.; Kitadai, Y.; Shinagawa, K.; Yuge, R.; Higashi, Y.; Tanaka, S.; Yasui, W.; Chayama, K. Mesenchymal Stem Cells Induce Epithelial to Mesenchymal Transition in Colon Cancer Cells Through Direct Cell-to-Cell Contact. *Neoplasia* **2017**, *19*, 429–438.
70. Mistry, J.; Finn, R. D.; Eddy, S. R.; Bateman, A.; Punta, M. Challenges in Homology Search: HMMER3 and Convergent Evolution of Coiled-Coil Regions. *Nucleic Acids Res.* **2013**, *41*, e121
71. Buchfink, B.; Xie, C.; Huson, D. H. Fast and Sensitive Protein Alignment Using DIAMOND. *Nat. Methods* **2015**, *12*, 59–60.
